# Supplementary material
Source: Springer Nature journal article supplement (https://www.springermedizin.de/resource/supplementary/12984_2011_364_MOESM7_ESM.pdf/9605866)

Time (sec), N. of peaks

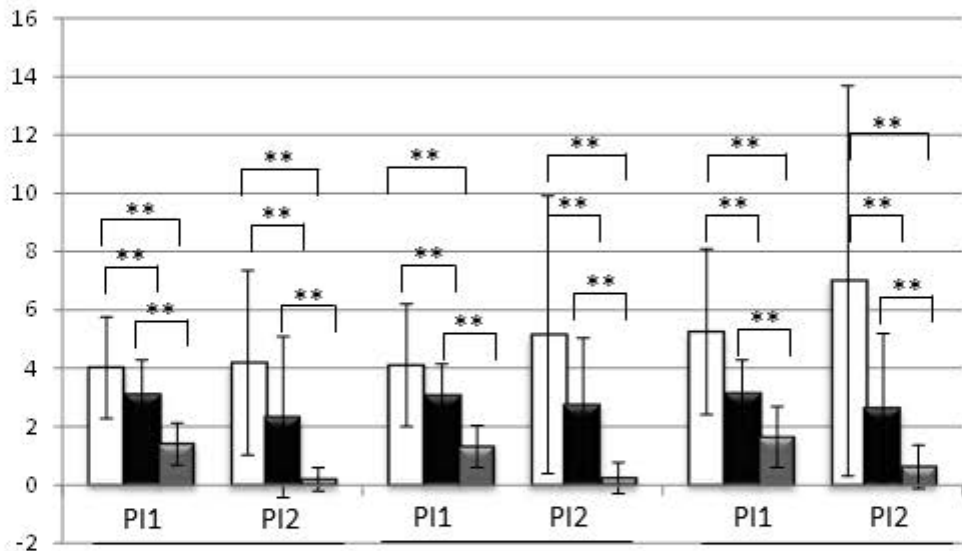

□ Adm  
■ Disch  
■ Control

Contralateral

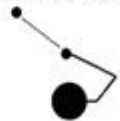

Central

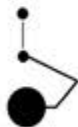

Ipsilateral

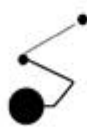

Supplement: MOESM7 [file 9605866]
